# Supplementary material for: Crystal structures and sodium/silver distributions within the ionic conductors Na5Ag2Fe3(As2O7)4and Na2Ag5Fe3(P2O7)4
Source: Royal Society of Chemistry journal article supplement (doi:10.1039/b9nj00355j), 2009-11-24
Supplement: b9nj00355j.pdf [file b9nj00355j.pdf]

Table 1. Crystal data, data collection and structure refinement parameters for  $\text{Ag}_2\text{Na}_5\text{Fe}_3(\text{As}_2\text{O}_7)_4$  and  $\text{Ag}_5\text{Na}_2\text{Fe}_3(\text{P}_2\text{O}_7)_4$  at 100 and 298 K.

|                                                           | $\text{Ag}_2\text{Na}_5\text{Fe}_3(\text{As}_2\text{O}_7)_4$         |                                                                      | $\text{Ag}_5\text{Na}_2\text{Fe}_3(\text{P}_2\text{O}_7)_4$          |                                                                      |
|-----------------------------------------------------------|----------------------------------------------------------------------|----------------------------------------------------------------------|----------------------------------------------------------------------|----------------------------------------------------------------------|
| Temperature (K)                                           | 100                                                                  | 298                                                                  | 100                                                                  | 298                                                                  |
| $M_r/\text{g mol}^{-1}$                                   | 1545.58                                                              | 1545.58                                                              | 1448.63                                                              | 1448.63                                                              |
| Crystal symmetry                                          | Monoclinic                                                           | Monoclinic                                                           | Monoclinic                                                           | Monoclinic                                                           |
| Space group                                               | C2/c (n <sup>o</sup> 15)                                             |
| $a/\text{Å}$                                              | 9.973(2)                                                             | 9.9512(3)                                                            | 28.551(5)                                                            | 9.5375(3)                                                            |
| $b/\text{Å}$                                              | 8.549(2)                                                             | 8.5741(2)                                                            | 8.363(1)                                                             | 8.3886(3)                                                            |
| $c/\text{Å}$                                              | 28.664(6)                                                            | 28.8231(8)                                                           | 30.064(6)                                                            | 28.0971(9)                                                           |
| $\beta^\circ$                                             | 94.152(3)                                                            | 93.910(1)                                                            | 111.890(3)                                                           | 93.623(2)                                                            |
| $V/\text{Å}^3$                                            | 2437.6(8)                                                            | 2453.5(1)                                                            | 6661(2)                                                              | 2243.4(3)                                                            |
| Z                                                         | 4                                                                    | 4                                                                    | 12                                                                   | 4                                                                    |
| Calculated density ( $\text{g.cm}^{-3}$ )                 | 4.2104                                                               | 4.1828                                                               | 4.3322                                                               | 4.2876                                                               |
| Equipment                                                 | Bruker SMART CCD<br>1K                                               | Bruker X8                                                            | Bruker SMART CCD<br>1K                                               | Bruker X8                                                            |
| Radiation MoK $\alpha$ (Å)                                | 0.71073                                                              | 0.71073                                                              | 0.71073                                                              | 0.71073                                                              |
| Scan mode                                                 | $\omega$ - scan                                                      | $\omega$ - scan                                                      | $\omega$ - scan                                                      | $\omega$ - scan                                                      |
| Recording angular range $2\theta$ (°)                     | 5.70 – 57.32                                                         | 5.66 – 89.14                                                         | 4.96 – 57.5                                                          | 2.90 – 73.1                                                          |
| Recording reciprocal space                                | $-12 \leq h \leq 13$<br>$-10 \leq k \leq 11$<br>$-38 \leq l \leq 38$ | $-19 \leq h \leq 17$<br>$-15 \leq k \leq 15$<br>$-54 \leq l \leq 52$ | $-36 \leq h \leq 38$<br>$-11 \leq k \leq 11$<br>$-40 \leq l \leq 39$ | $-15 \leq h \leq 15$<br>$-14 \leq k \leq 14$<br>$-46 \leq l \leq 46$ |
| Number of measured reflections                            | 9766                                                                 | 54142                                                                | 21371                                                                | 54056                                                                |
| Number of independent reflections<br>[ $I > 3\sigma(I)$ ] | 2522                                                                 | 7600                                                                 | 2803                                                                 | 4784                                                                 |
| R merging factor (%)                                      | 3.58                                                                 | 3.40                                                                 | 7.10                                                                 | 3.32                                                                 |
| $\mu$ ( $\text{mm}^{-1}$ ) for MoK $\alpha$               | 14.317                                                               | 14.223                                                               | 6.970                                                                | 6.899                                                                |
| Number of refined parameters /<br>restrictions            | 212 / 2                                                              | 242 / 2                                                              | 358 / 6                                                              | 255 / 2                                                              |
| Refinement method                                         | Least squares on F                                                   |
| $R_1$ (F) [ $I > 3\sigma(I)$ ] (%) <sup>a</sup>           | 2.64                                                                 | 3.11                                                                 | 5.45                                                                 | 2.62                                                                 |
| $wR_2$ ( $F^2$ ) [ $I > 3\sigma(I)$ ] (%) <sup>b</sup>    | 2.73                                                                 | 3.20                                                                 | 5.66                                                                 | 2.64                                                                 |
| Weighting scheme                                          | unit                                                                 | unit                                                                 | unit                                                                 | unit                                                                 |
| Goodness of fit                                           | 1.36                                                                 | 0.95                                                                 | 2.71                                                                 | 0.93                                                                 |
| Isotropic secondary extinction (type I)                   | 0.049(2)                                                             | 0.028(1)                                                             | 0.016(4)                                                             | 0.023(2)                                                             |
| Min / Max $\Delta\rho$ $e/\text{Å}^3$                     | -0.71 / 1.61                                                         | -1.84 / 1.85                                                         | -1.74 / 1.64                                                         | -1.80 / 1.37                                                         |

$$^a R_1(F) = \frac{\sum \left| |F_o| - |F_c| \right|}{\sum |F_o|} \cdot \quad ^b wR_2(F^2) = \left[ \frac{\sum w(F_o^2 - F_c^2)^2}{\sum w(F_o^2)} \right]^{1/2}$$
